# Supplementary material for: Synergetic effect of pyrene-based fluorescent probes for trace nitroaniline sensing
Source: Royal Society of Chemistry journal article supplement (doi:10.1039/d3nj04102f), 2023-01-01
Supplement: d3nj04102f1.pdf [file d3nj04102f1.pdf]

## **Synergetic effect of pyrene-based fluorescent probe for trace nitroaniline sensing**

Shaoling Li,<sup>a</sup> Wei Liu,<sup>a</sup> Xinyi Song,<sup>a</sup> Chuan-Zeng Wang,<sup>\*b</sup> Carl Redshaw,<sup>d</sup> Xing Feng,<sup>\*a</sup>

<sup>a</sup>*School of Material and Energy, Guangdong University of Technology, Guangzhou, 510006, P. R. China Email: [hyxhn@sina.com](mailto:hyxhn@sina.com) (X. Feng).*

<sup>b</sup>*School of Chemistry and Chemical Engineering, Shandong University of Technology, Zibo 255049, P. R. China. E-mail: [13639028944@163.com](mailto:13639028944@163.com) (C.Z. Wang).*

<sup>c</sup>*Chemistry, School of Natural Sciences, University of Hull, Hull, Yorkshire HU6 7RX, UK.*

## Table of Contents

|                                                            |    |
|------------------------------------------------------------|----|
| 1. NMR spectra .....                                       | 3  |
| 2. High Resolution Mass Spectroscopy .....                 | 8  |
| 3. TGA analysis.....                                       | 10 |
| 4. Photophysical Properties .....                          | 11 |
| 5. Detection of nitroaniline .....                         | 15 |
| 6. Interference experiment for detecting nitroaniline..... | 19 |

# 1. NMR spectra

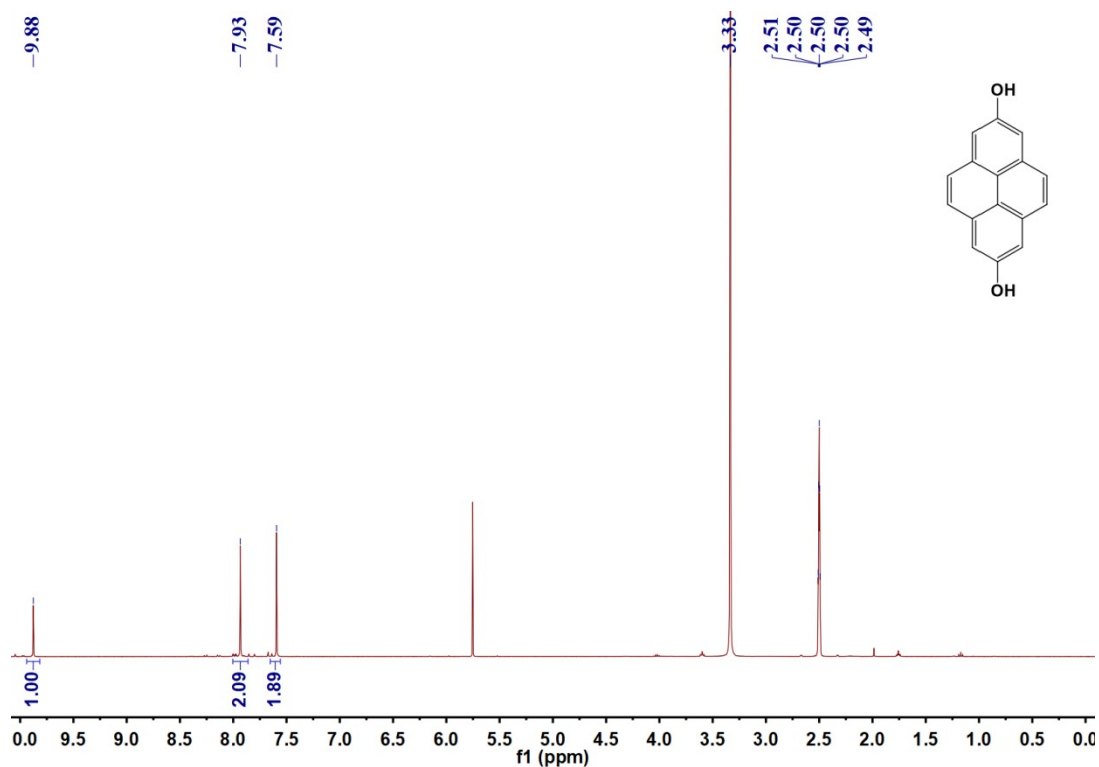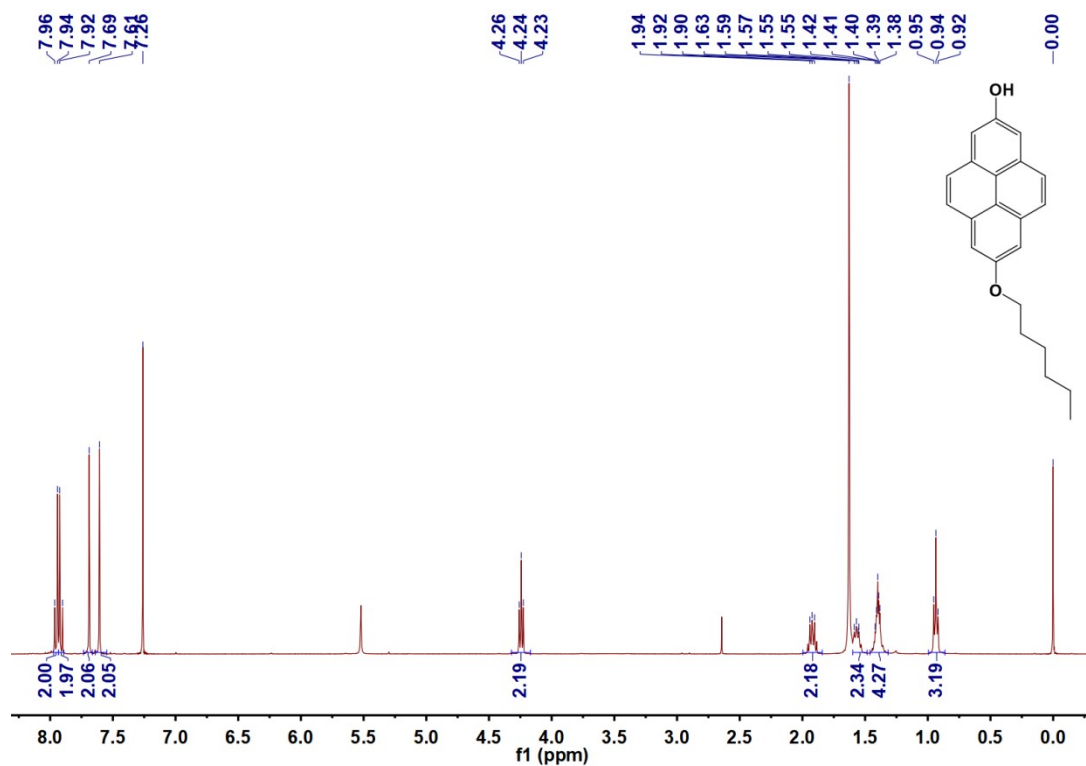

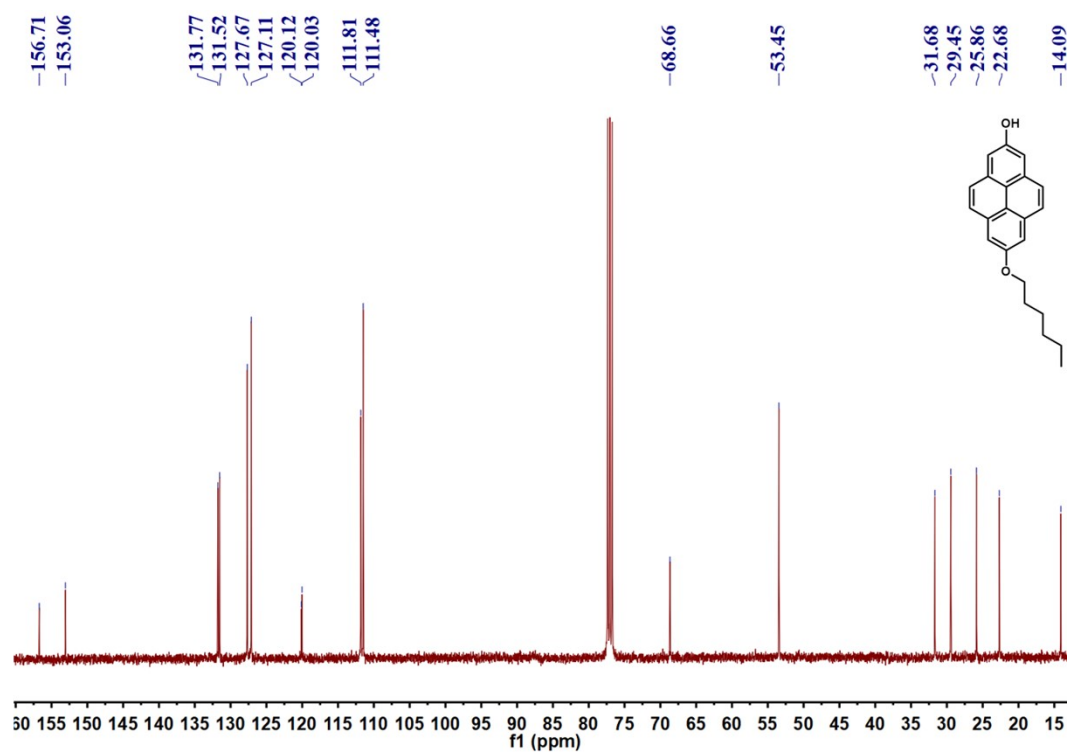

**Figure S3**  $^{13}\text{C}$ -NMR spectrum (100 MHz, 293 K, \*  $\text{CDCl}_3$ ) for **2**

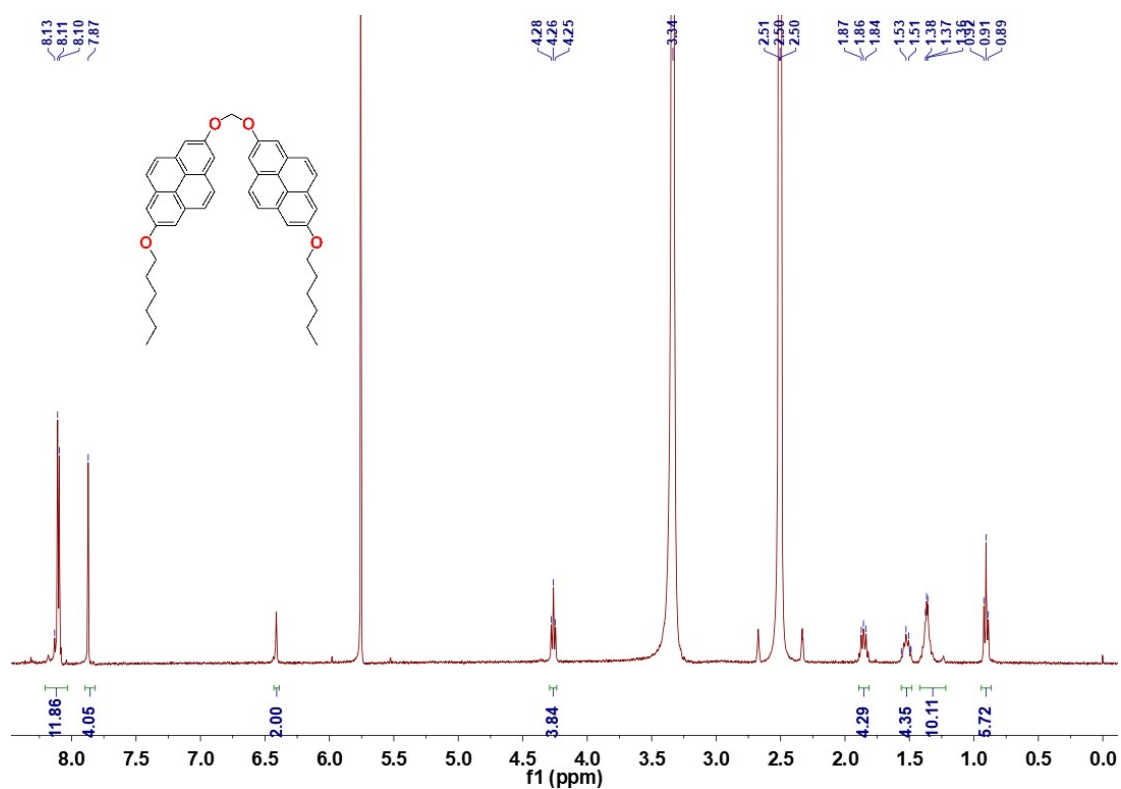

**Figure S4**  $^1\text{H}$ -NMR spectrum (400 MHz, 293 K,  $\text{DMSO-d}_6$ ) for **3a**

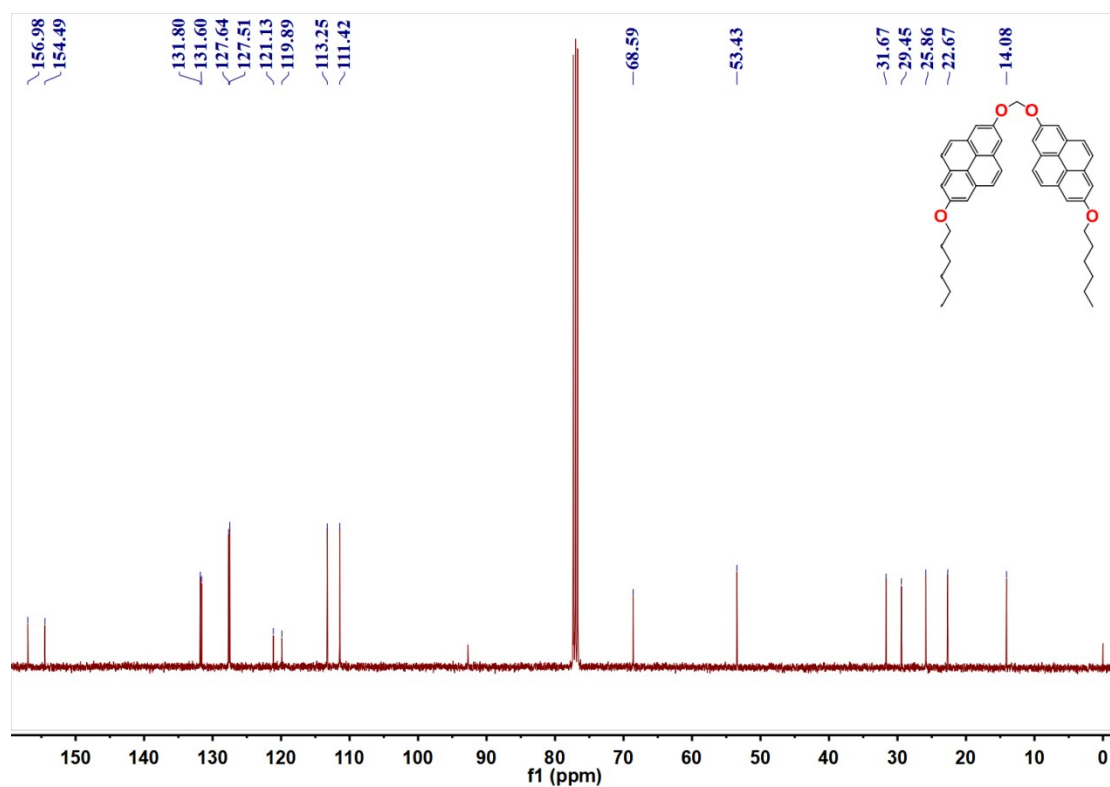

Figure S5 <sup>13</sup>C-NMR spectrum (100 MHz, 293 K, \* CDCl<sub>3</sub>) for 3a

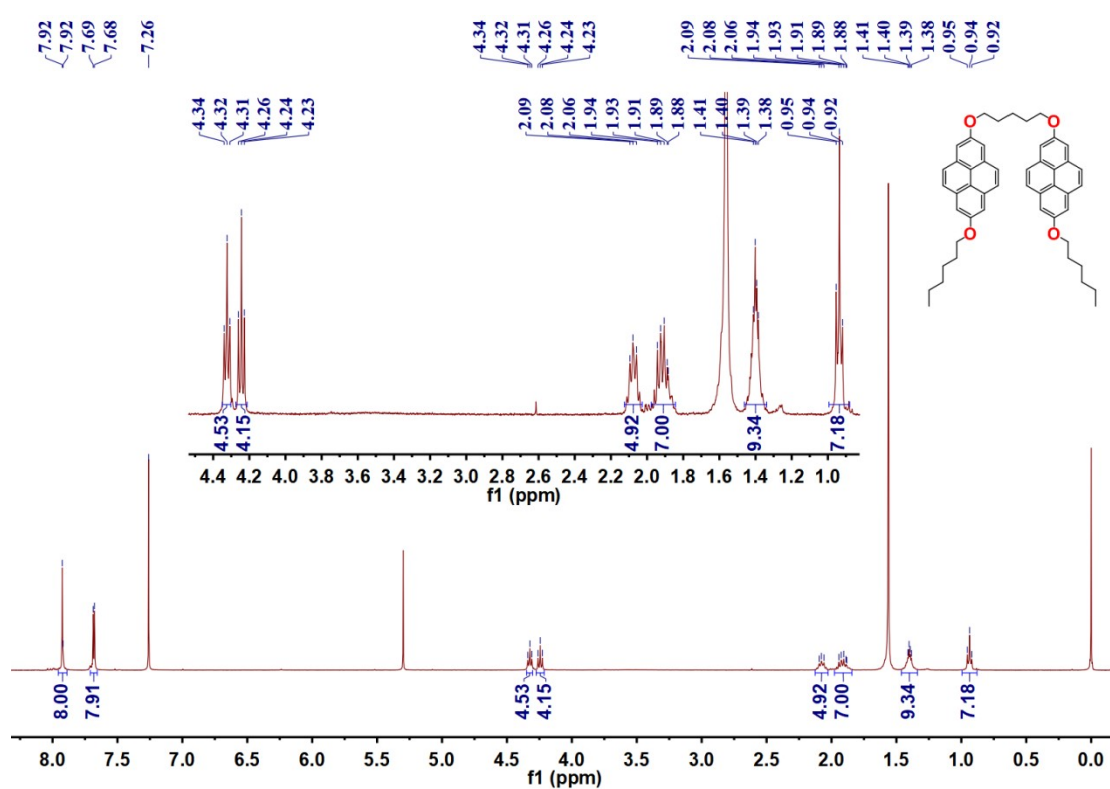

Figure S6 <sup>1</sup>H-NMR spectrum (400 MHz, 293 K, \* CDCl<sub>3</sub>) for 3b

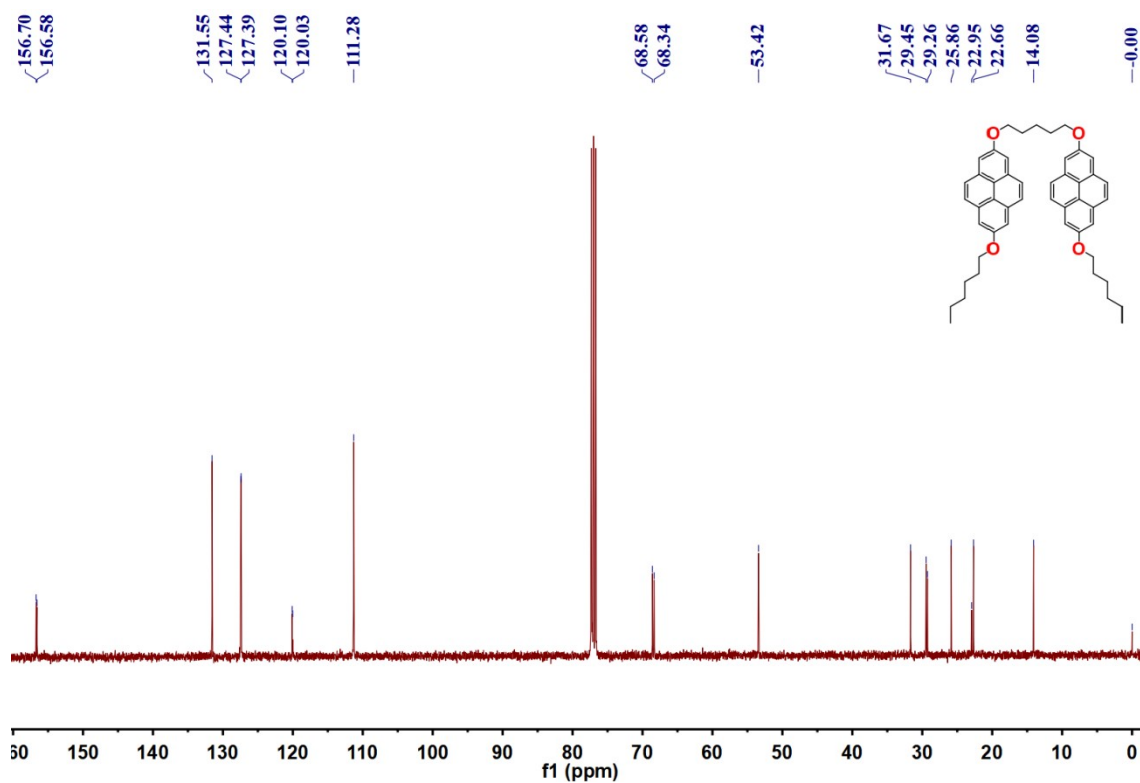

Figure S7 <sup>13</sup>C-NMR spectrum (100 MHz, 293 K, \* CDCl<sub>3</sub>) for **3b**

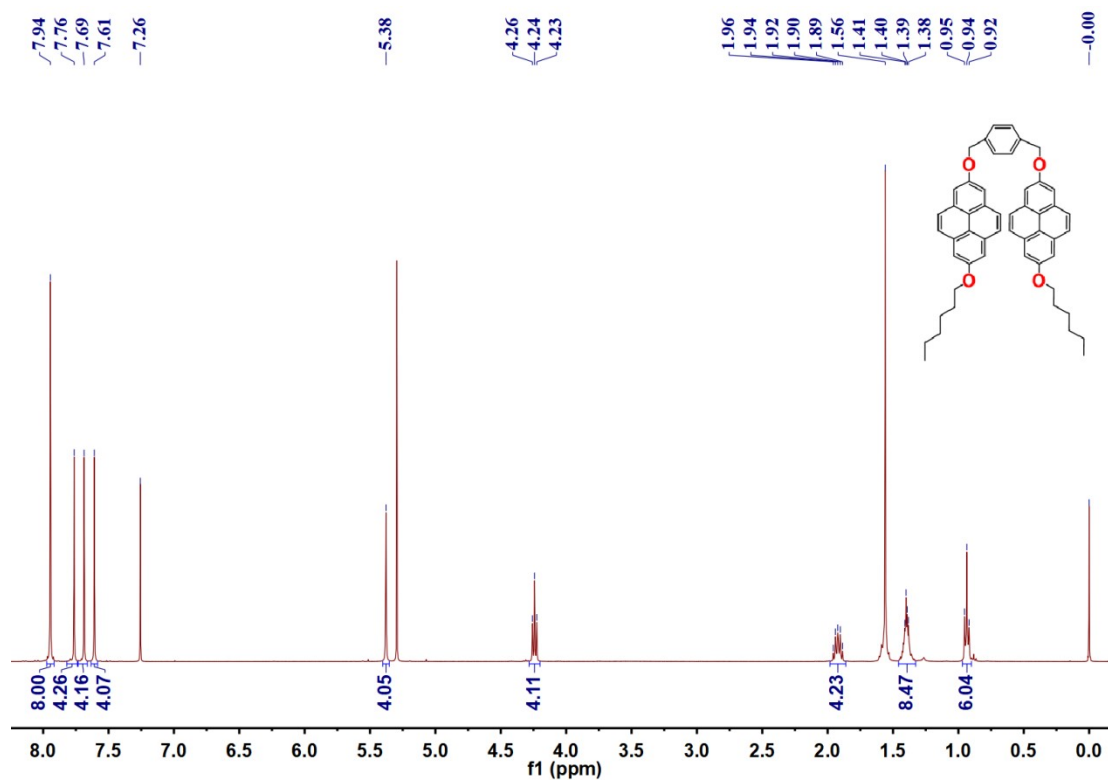

Figure S8 <sup>1</sup>H-NMR spectrum (400 MHz, 293 K, \* CDCl<sub>3</sub>) for **3c**

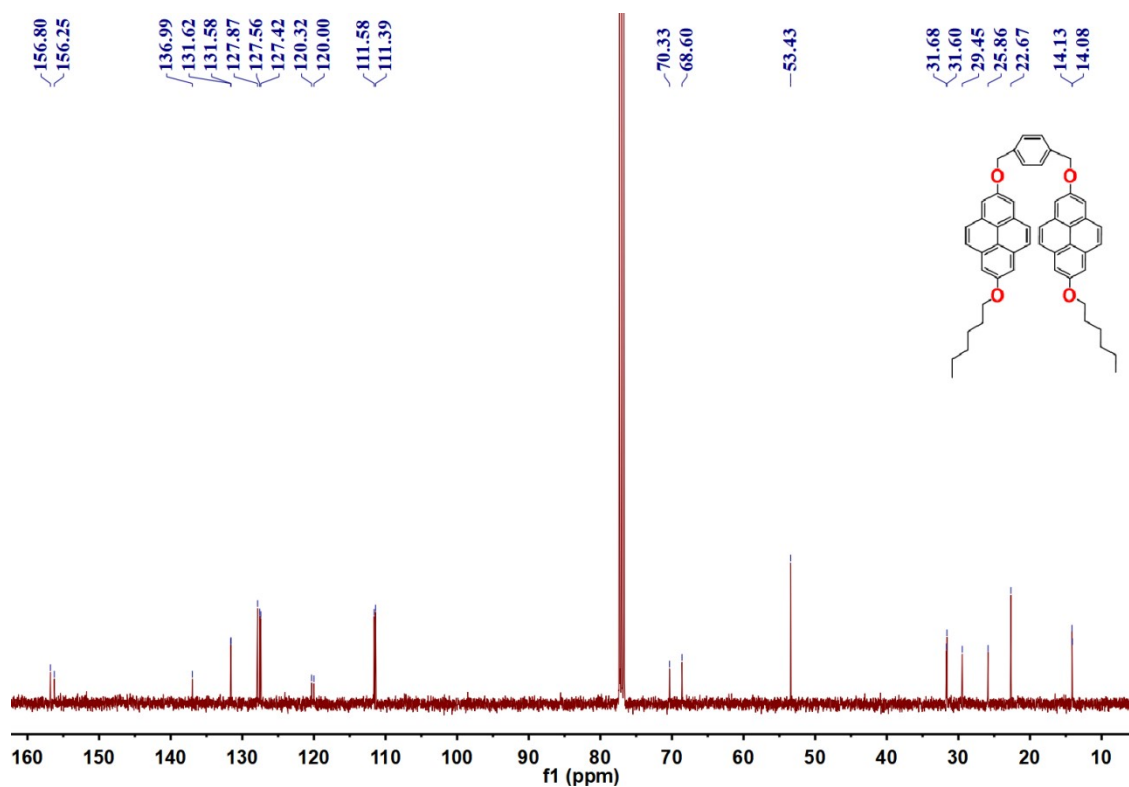

**Figure S9**  $^{13}\text{C}$ -NMR spectrum (100 MHz, 293 K, \*  $\text{CDCl}_3$ ) for **3c**

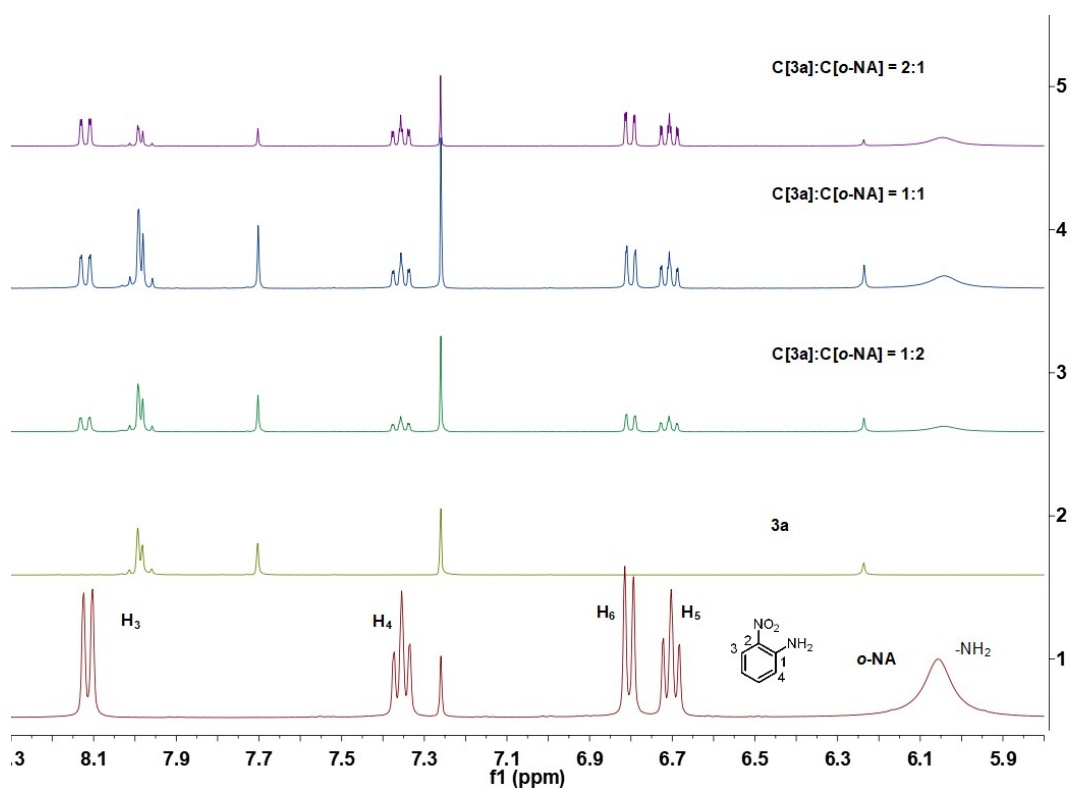

**Figure S10**  $^1\text{H}$  NMR spectrum (400 MHz, 293 K, \*  $\text{CDCl}_3$ ) of fluorescent probe **3a**, and **o-NA** with different concentration.

## 2. High Resolution Mass Spectroscopy

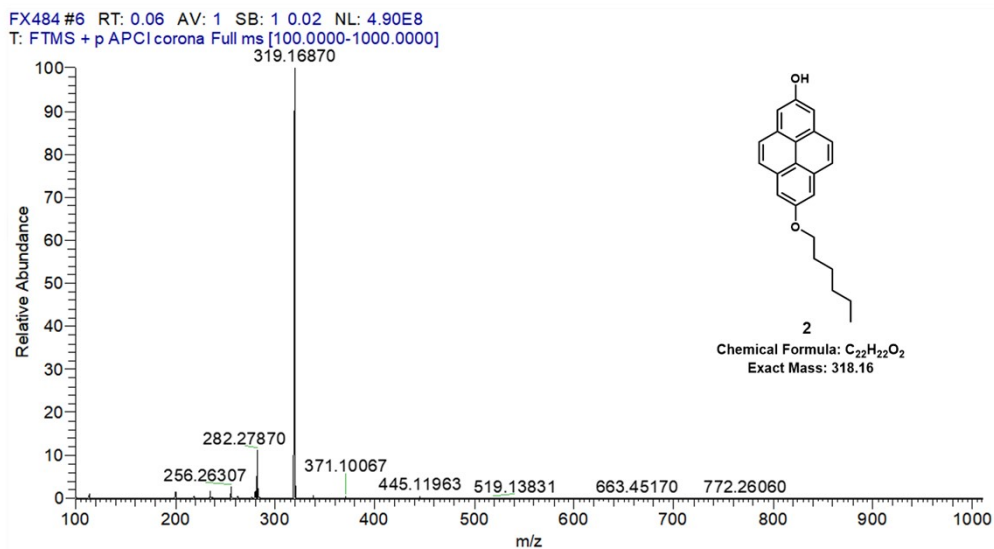

Figure S11 HRMS spectra of **2**

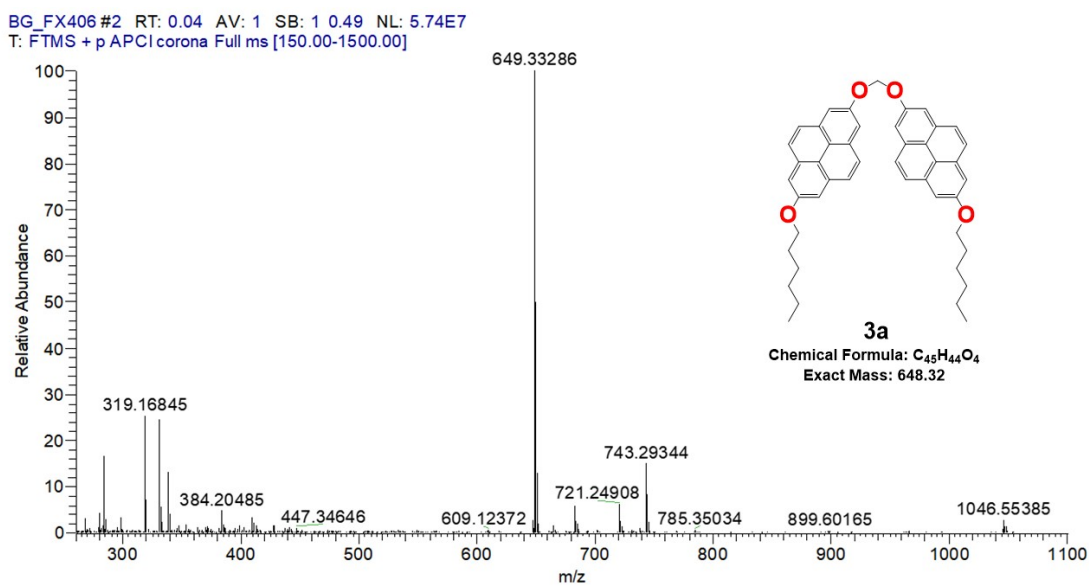

Figure S12 HRMS spectra of **3a**



BG\_FX407 #2 RT: 0.04 AV: 1 NL: 4.42E7  
T: FTMS + p APCI corona Full ms [150.00-1500.00]

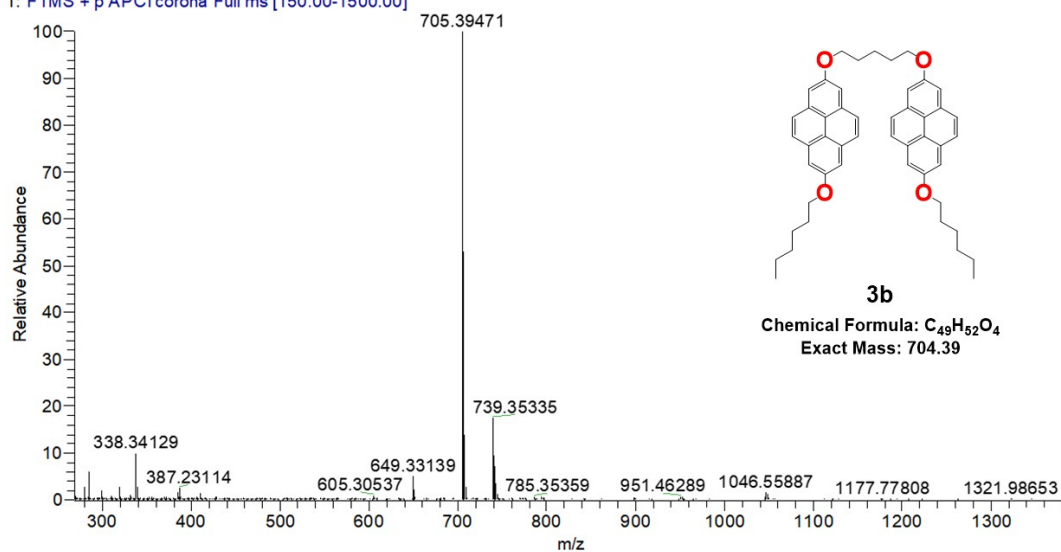

Figure S13 HRMS spectra of **3b**

BG\_FX408 #2 RT: 0.05 AV: 1 NL: 2.75E7  
T: FTMS + p APCI corona Full ms [150.00-1500.00]

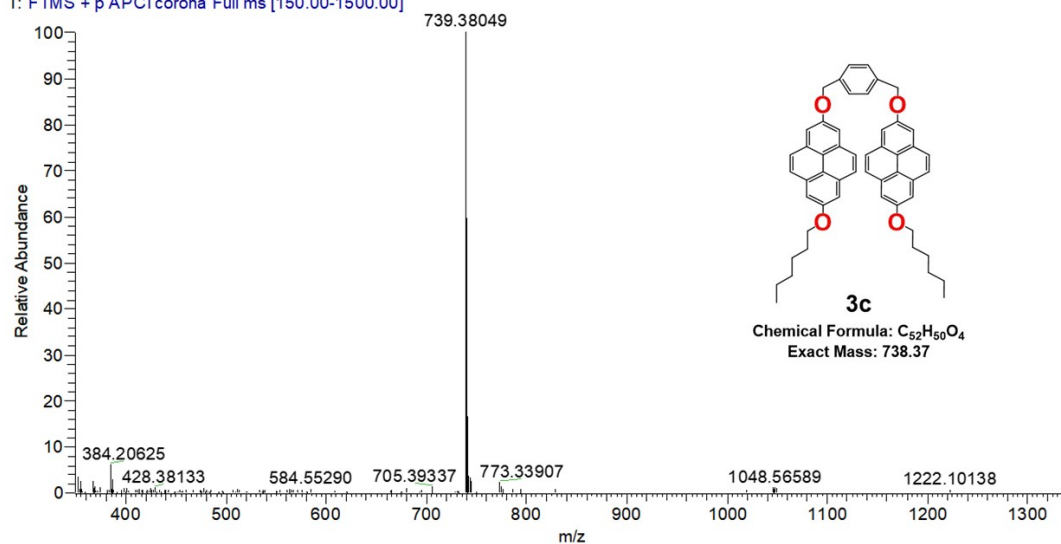

Figure S14 HRMS spectra of **3c**

### 3. TGA analysis

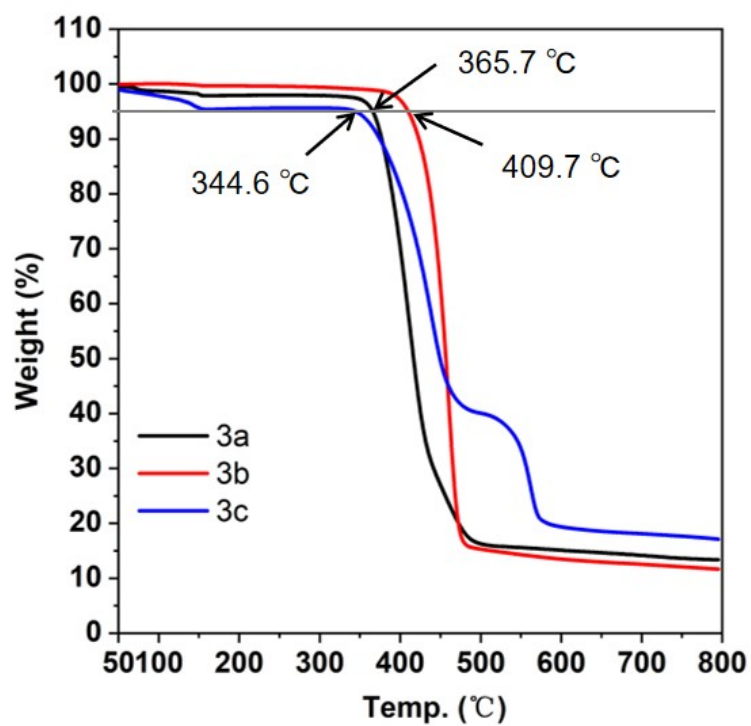

**Figure S15** TGA thermogram of 3a-c recorded under nitrogen at a heating rate of 10 °C/min.

## 4. Photophysical Properties

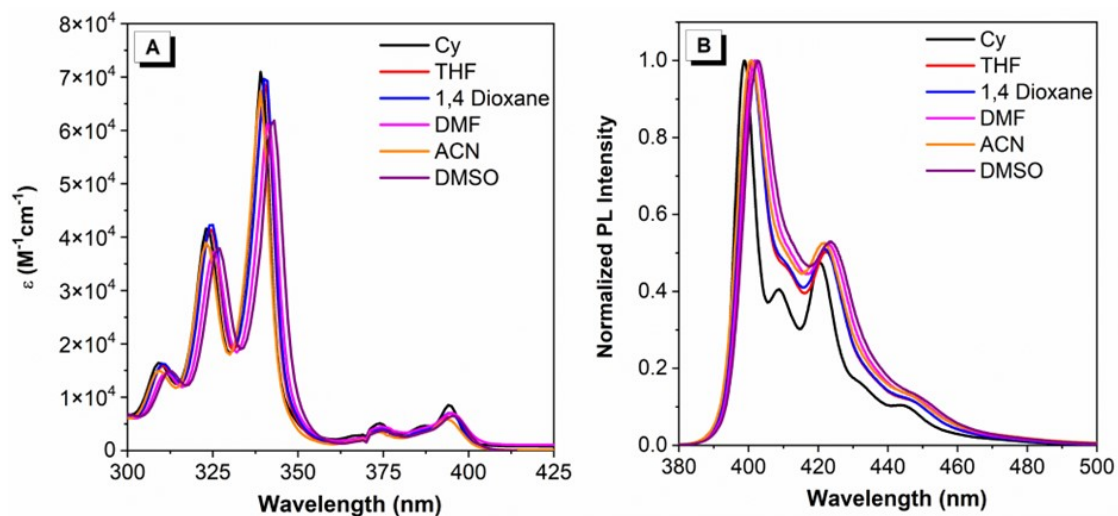

**Figure S16** (A) UV-vis spectra and (B) Fluorescence spectra of **3a** recorded in six solvents at  $\sim 10^{-5}$  M and 25 °C.

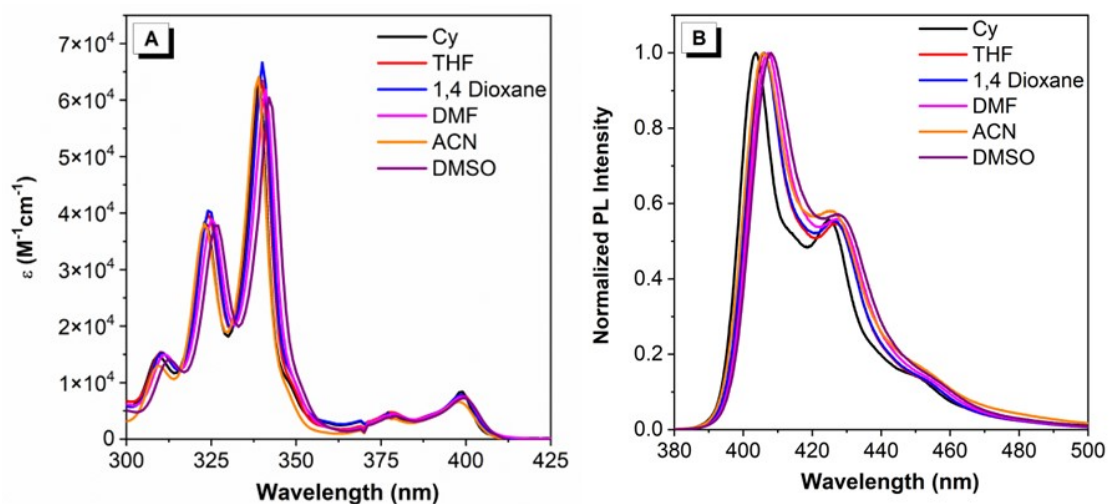

**Figure S17** (A) UV-vis spectra and (B) Fluorescence spectra of **3b** recorded in six solvents at  $\sim 10^{-5}$  M and 25 °C.

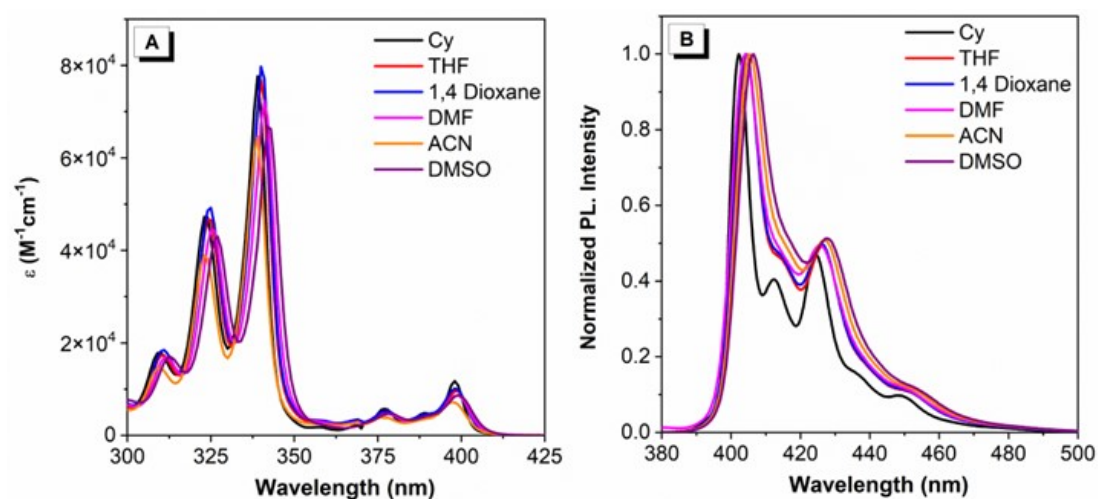

**Figure S18** (A) UV-vis spectra and (B) Fluorescence spectra of **3c** recorded in six solvents at  $\sim 10^{-5}$  M and 25 °C.

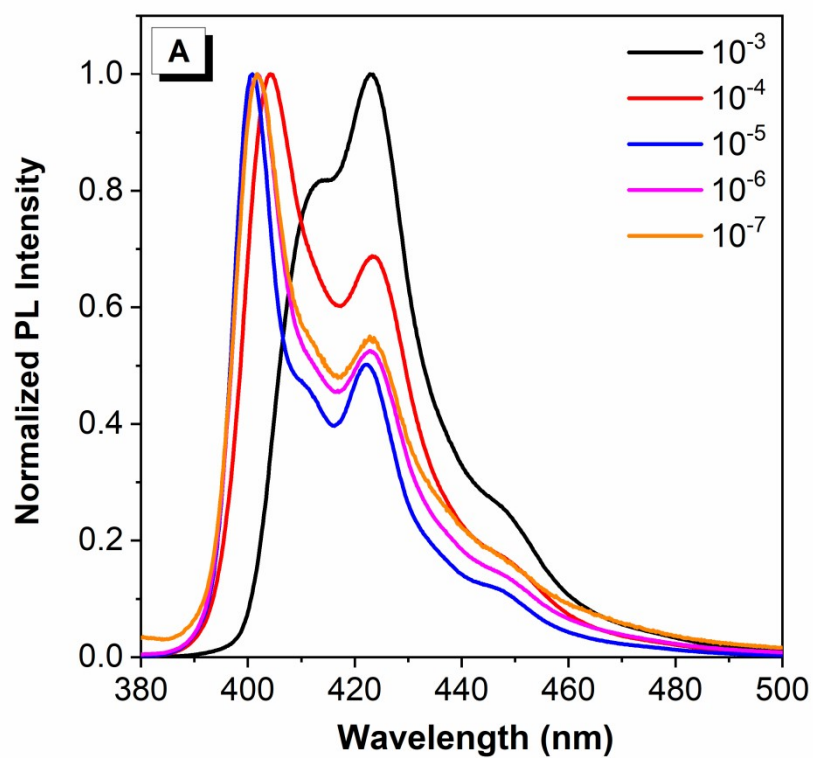

**Figure S19** Concentration dependent fluorescence spectra of **3a** recorded in THF solvents at 25 °C.

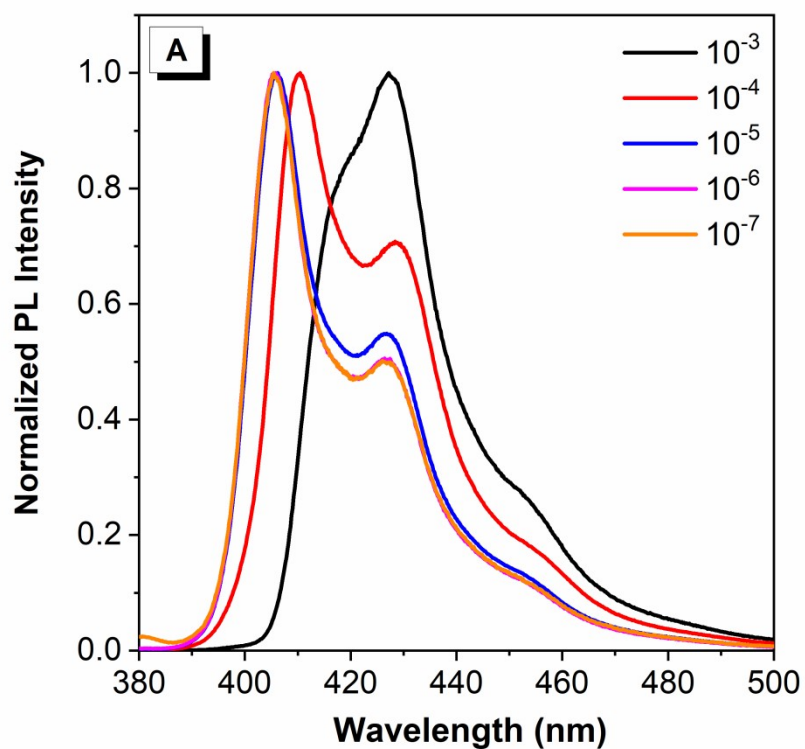

**Figure S20** Concentration dependent fluorescence spectra of **3b** recorded in THF solvents at 25°C.

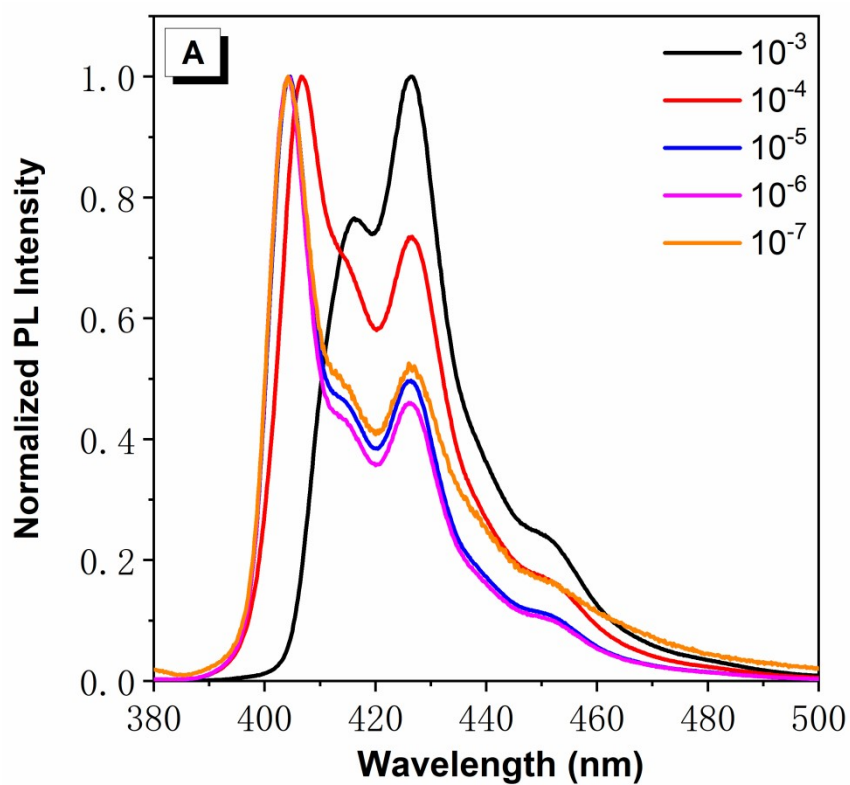

**Figure S21** Concentration dependent fluorescence spectra of **3c** recorded in THF solvents at 25°C.

**Table S1.** UV-vis and emission spectroscopic data for **3a-c** in different solvents at 25 °C.

| Comp.     | Cy                                                   | THF                                                  | 1,4-dioxane                                          | DMF                                                  | ACN                                                  | DMSO                                              |
|-----------|------------------------------------------------------|------------------------------------------------------|------------------------------------------------------|------------------------------------------------------|------------------------------------------------------|---------------------------------------------------|
|           | $\lambda_{\text{abs}} / \lambda_{\text{em}}$<br>(nm) | $\lambda_{\text{abs}} / \lambda_{\text{em}}$ (nm) |
| <b>3a</b> | 339; 394/ 399;420                                    | 340; 395/ 401; 422                                   | 340; 394/ 401; 422                                   | 341; 395/ 402; 423                                   | 339; 394/ 401; 421                                   | 343; 395/ 403; 423                                |
| <b>3b</b> | 339; 399/ 404; 425                                   | 340; 399/ 406; 427                                   | 340; 399/ 406; 426                                   | 341; 399/ 407; 427                                   | 339; 398/ 406; 424                                   | 342; 399/ 408; 428                                |
| <b>3c</b> | 339; 398/ 402; 424                                   | 340; 399/ 404; 426                                   | 340; 398/ 404; 426                                   | 341; 399/ 405; 427                                   | 339; 397/ 404; 426                                   | 342; 399/ 406; 428                                |

## 5. Detection of nitroaniline

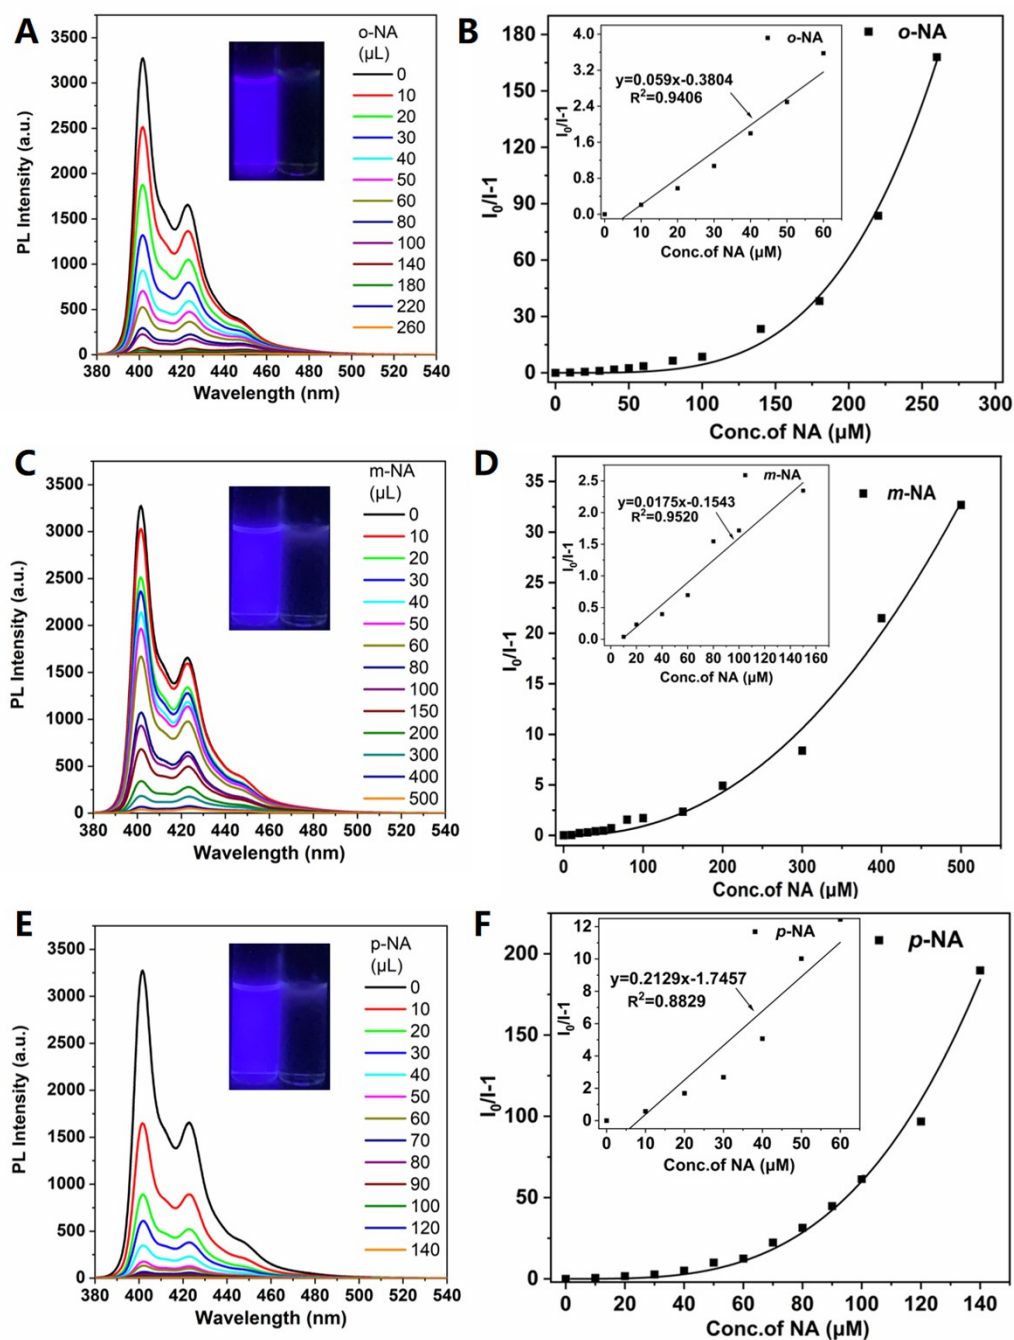

**Figure S22** Fluorescence quenching of **3a** with incremental addition of A) o-NA, C) m-NA, E) p-NA, and inset photographs show the visible change in the fluorescence under UV light before and after addition of NA; Corresponding Stern-Volmer plots for quenching of **3a** with (B) o-NA, (D) m-NA, (F) p-NA as quencher in DCM. Inset shows the Stern-Volmer plots at lower concentration of NA.



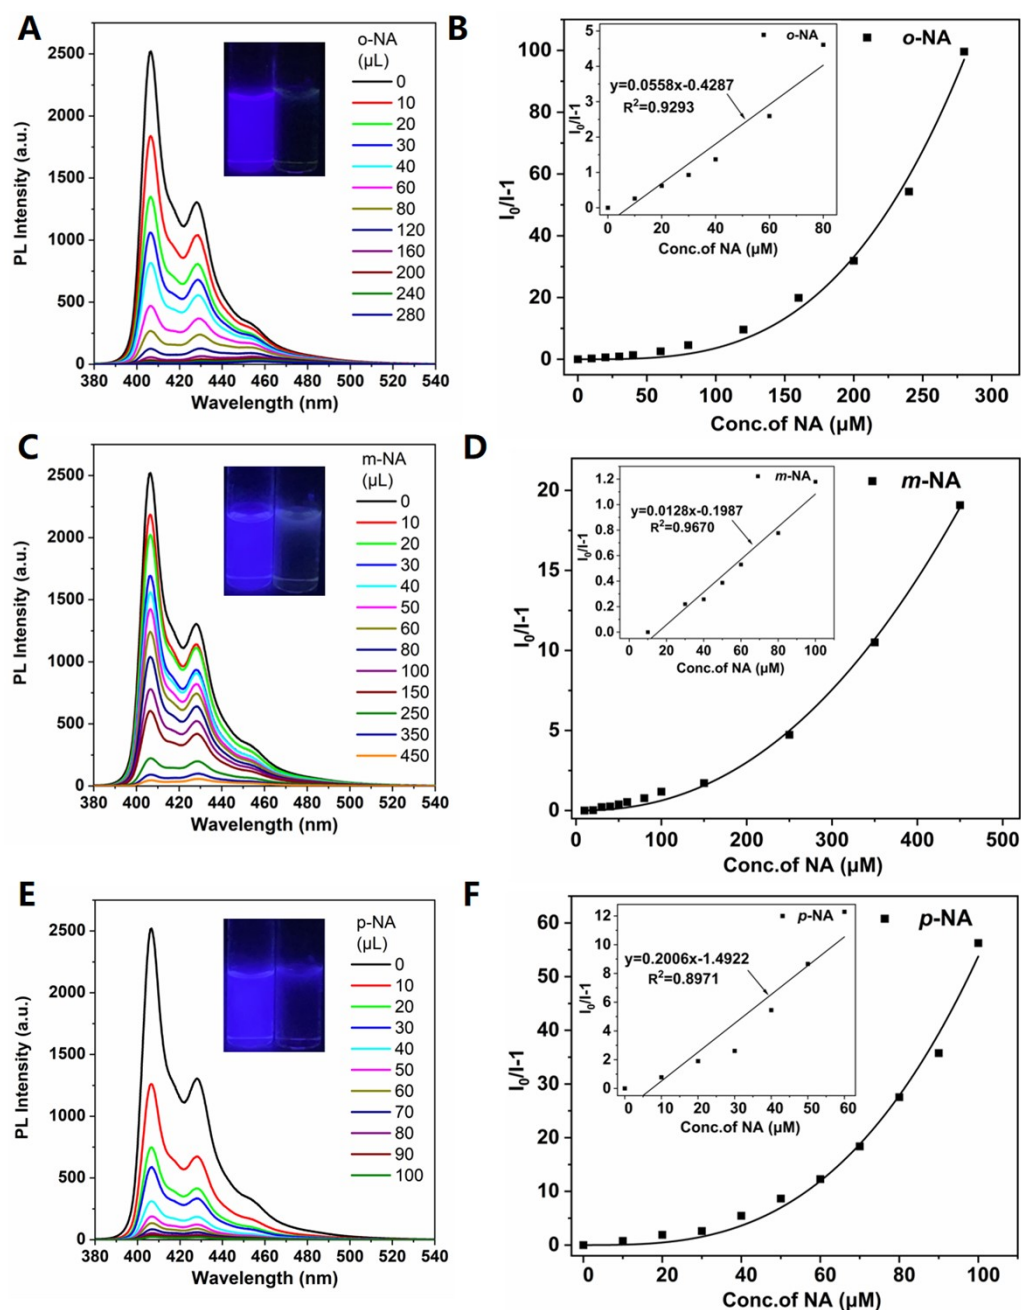

**Figure S23** Fluorescence quenching of **3b** with incremental addition of A) o-NA, C) m-NA, E) p-NA, and inset photographs show the visible change in the fluorescence under UV light before and after addition of NA; Corresponding Stern-Volmer plots for quenching of **3b** with (B) o-NA, (D) m-NA, (F) p-NA as quencher in DCM. Inset shows the Stern-Volmer plots at lower concentration of NA.



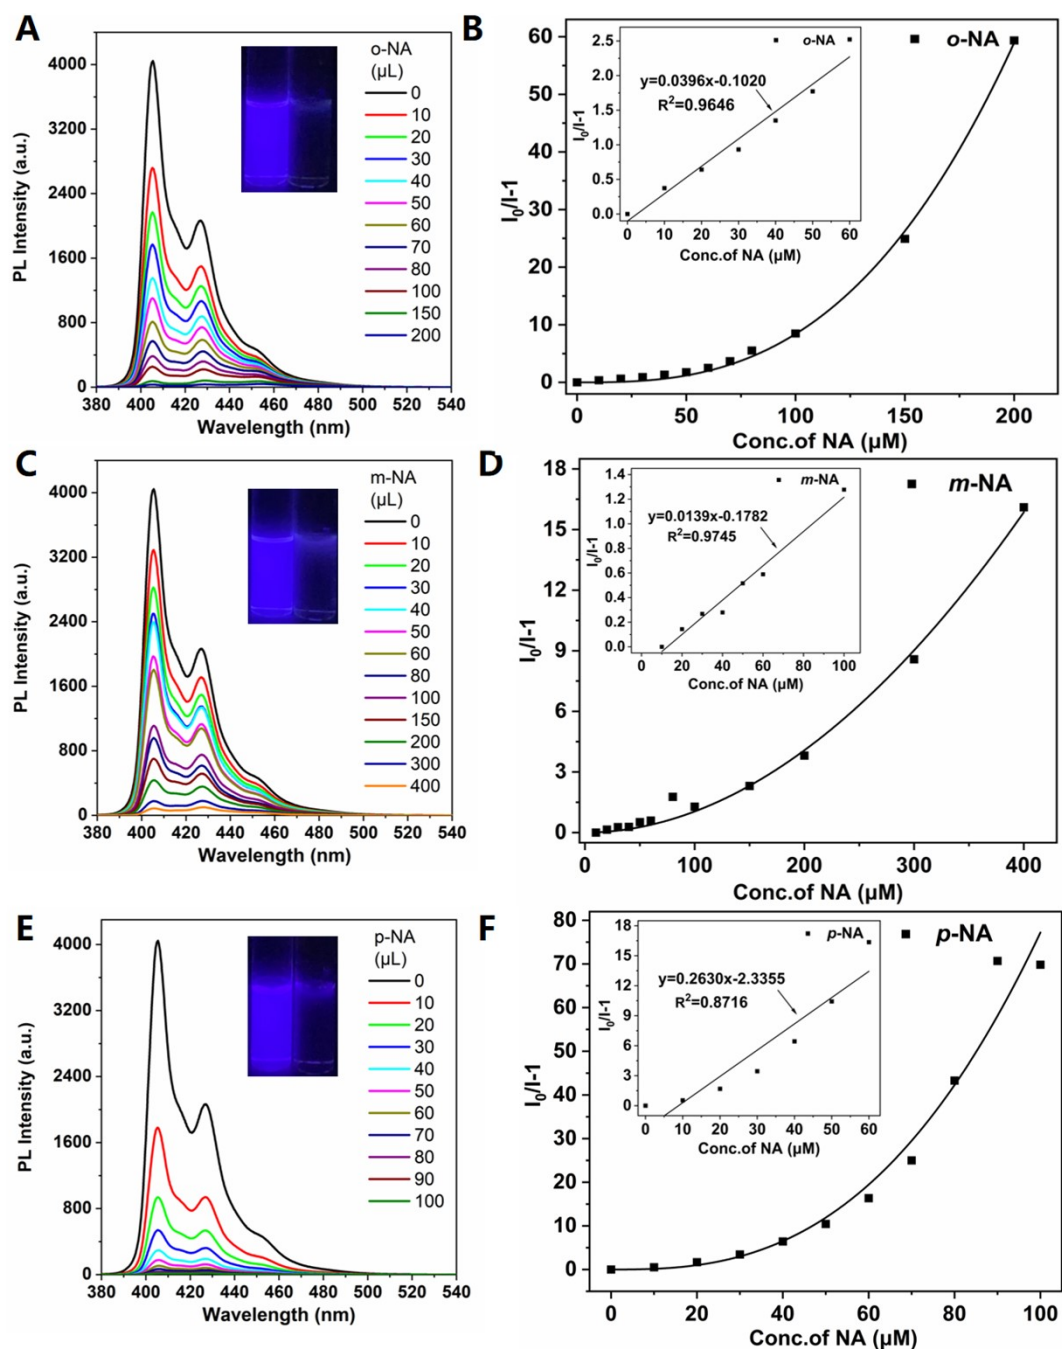

**Figure S24** Fluorescence quenching of **3c** with incremental addition of A) o-NA, C) m-NA, E) p-NA, and inset photographs show the visible change in the fluorescence under UV light before and after addition of NA; Corresponding Stern-Volmer plots for quenching of **3c** with (B) o-NA, (D) m-NA, (F) p-NA as quencher in DCM. Inset shows the Stern-Volmer plots at lower concentration of NA.

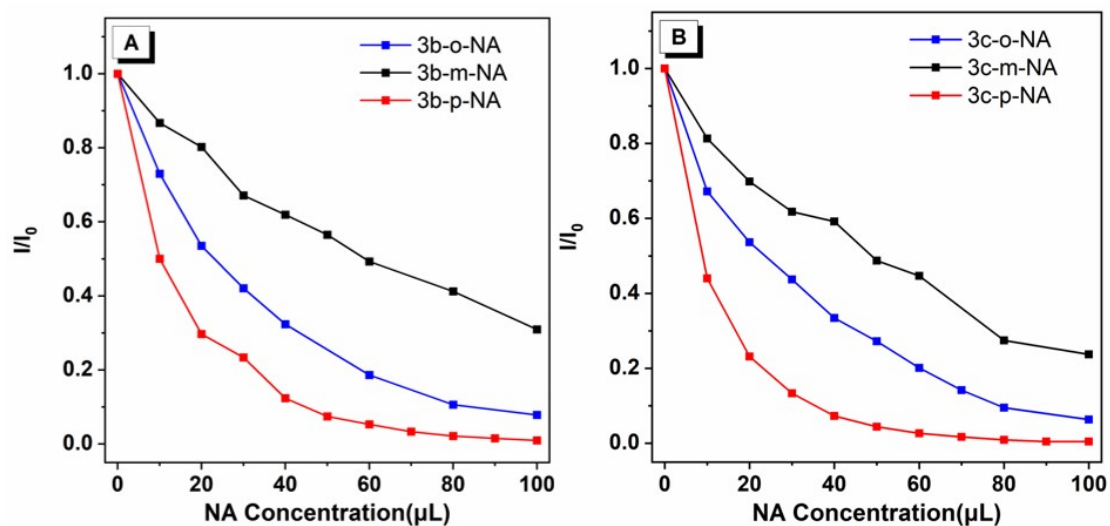

**Figure S25** Compounds (A) **3b**, (B) **3c** with NA relative PL intensity  $I/I_0$  diagram.

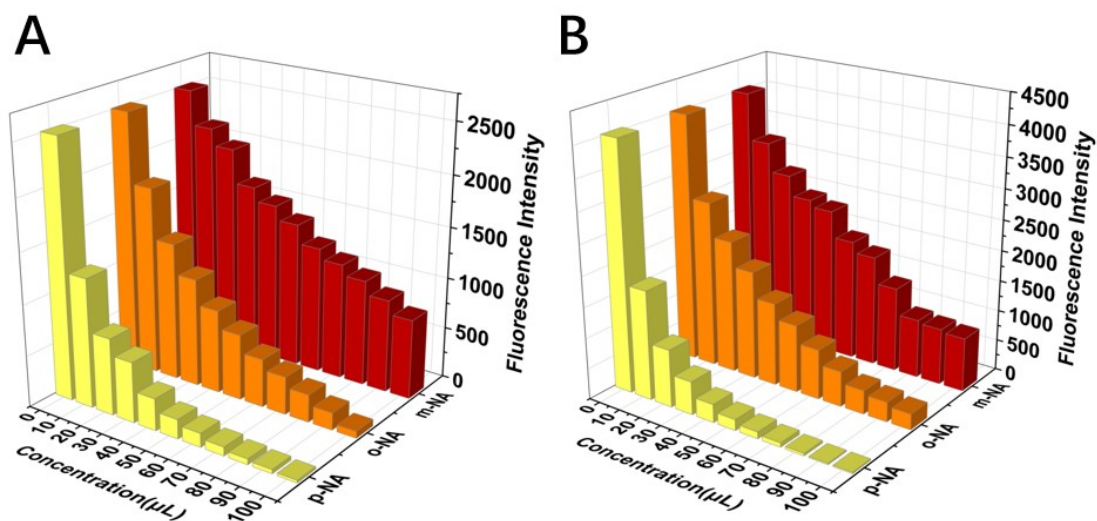

**Figure S26** The histogram of fluorescence quenching of (A) **3b**, (B) **3c** with NA.

## 6. Interference experiment for detecting nitroaniline

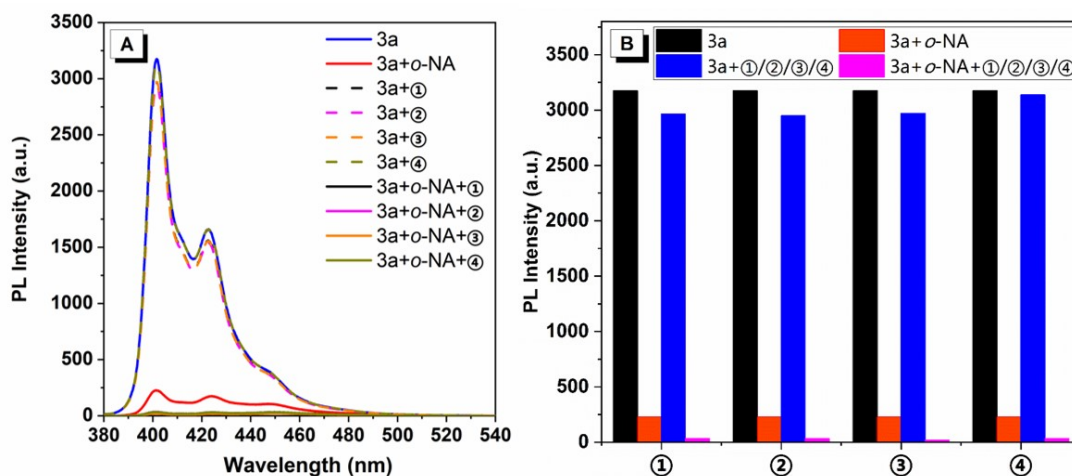

**Figure S27** The Interference experiments of fluorescent probe **3a** toward *o*-NA. (A) The emission spectra of fluorescent probe **3a** (10<sup>-5</sup> M) interacting with different interferent (10<sup>-5</sup> M) (① hydroquinone, ② *p*-benzaldehyde, ③ *o*-phenylenediamine, and ④ 1,3,5-phenyltricarboxylic acid). (B) histogram of the fluorescence intensity of the fluorescent probe **3a** in presence of different species.

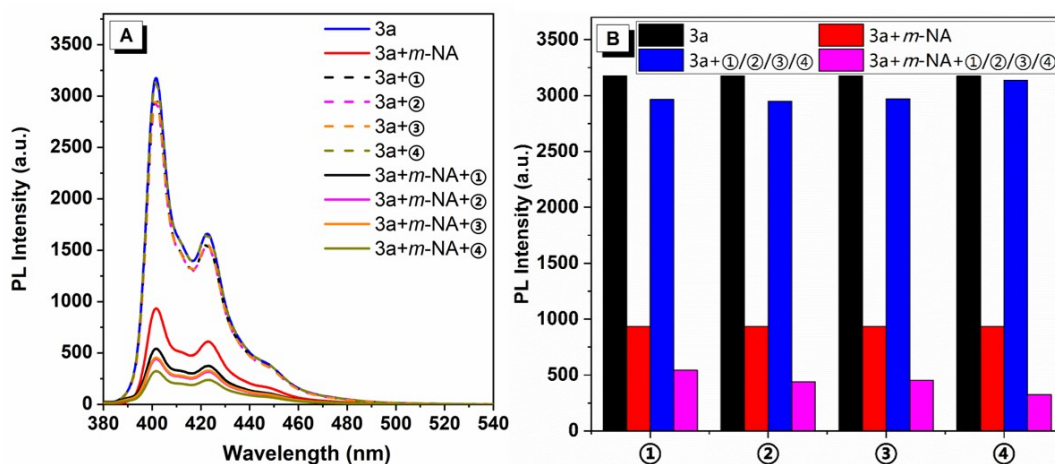

**Figure S28** The Interference experiments of fluorescent probe **3a** toward *m*-NA. (A) The emission spectra of fluorescent probe **3a** (10<sup>-5</sup> M) interacting with different interferent (10<sup>-5</sup> M) (① hydroquinone, ② *p*-benzaldehyde, ③ *o*-phenylenediamine, and ④ 1,3,5-phenyltricarboxylic acid). (B) histogram of the fluorescence intensity of the fluorescent probe **3a** in presence of different species.

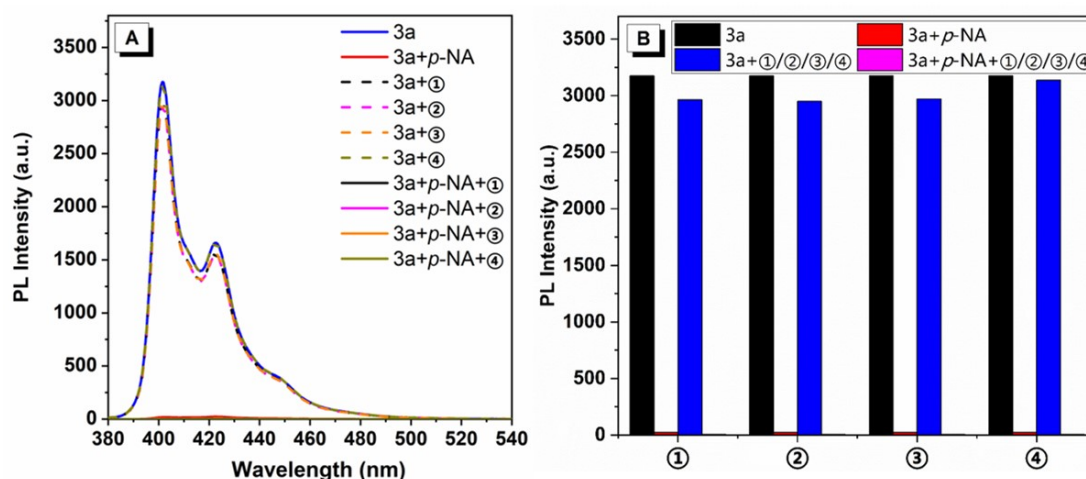

**Figure S29** The Interference experiments of fluorescent probe **3a** toward *p*-NA. (A) The emission spectra of fluorescent probe **3a** ( $10^{-5}$  M) interacting with different interferent ( $10^{-5}$  M) (① hydroquinone, ② *p*-benzaldehyde, ③ *o*-phenylenediamine, and ④ 1,3,5-phenyltricarboxylic acid). (B) histogram of the fluorescence intensity of the fluorescent probe **3a** in presence of different species.

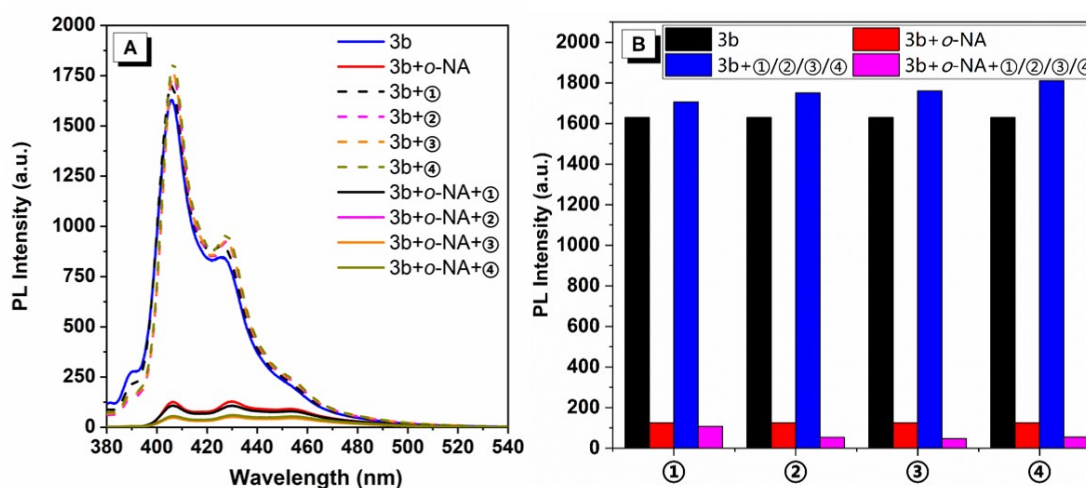

**Figure S30** The Interference experiments of fluorescent probe **3b** toward *o*-NA. (A) The emission spectra of fluorescent probe **3b** ( $10^{-5}$  M) interacting with different interferent ( $10^{-5}$  M) (① hydroquinone, ② *p*-benzaldehyde, ③ *o*-phenylenediamine, and ④ 1,3,5-phenyltricarboxylic acid). (B) histogram of the fluorescence intensity of the fluorescent probe **3b** in presence of different species.

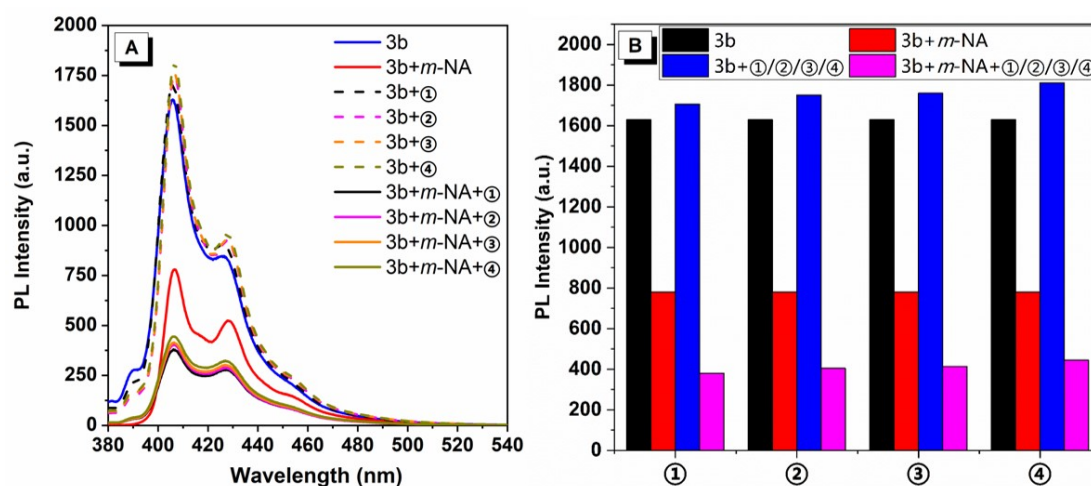

**Figure S31** The Interference experiments of fluorescent probe **3b** toward *m*-NA. (A) The emission spectra of fluorescent probe **3b** ( $10^{-5}$  M) interacting with different interferent ( $10^{-5}$  M) (① hydroquinone, ② *p*-benzaldehyde, ③ *o*-phenylenediamine, and ④ 1,3,5-phenyltricarboxylic acid). (B) histogram of the fluorescence intensity of the fluorescent probe **3b** in presence of different species.

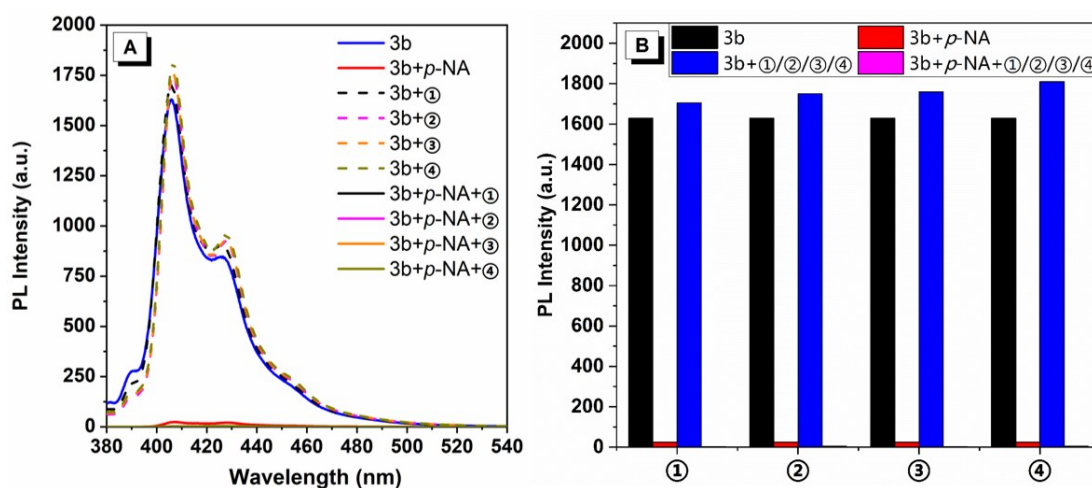

**Figure S32** The Interference experiments of fluorescent probe **3b** toward *p*-NA. (A) The emission spectra of fluorescent probe **3b** ( $10^{-5}$  M) interacting with different interferent ( $10^{-5}$  M) (① hydroquinone, ② *p*-benzaldehyde, ③ *o*-phenylenediamine, and ④ 1,3,5-phenyltricarboxylic acid). (B) histogram of the fluorescence intensity of the fluorescent probe **3b** in presence of different species.



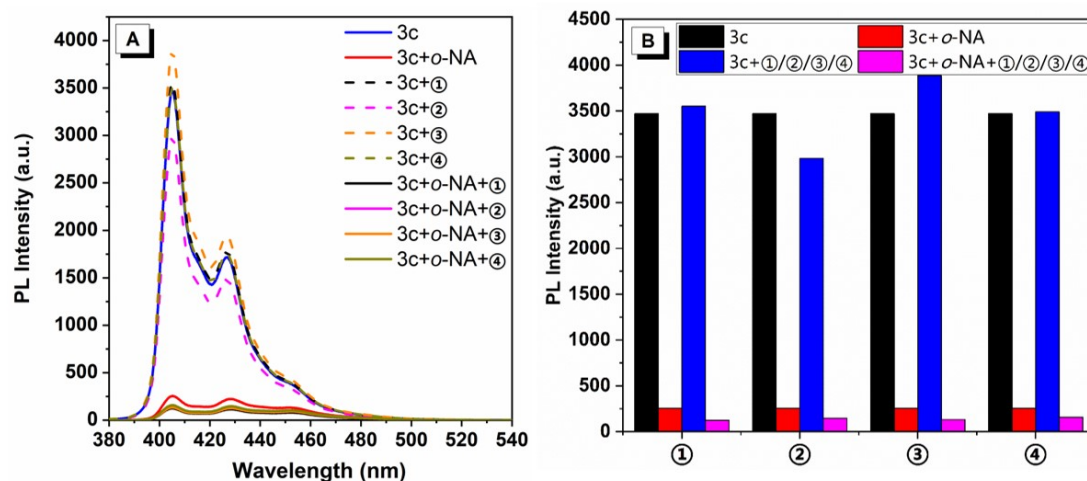

**Figure S33** The Interference experiments of fluorescent probe **3c** toward *o*-NA. (A) The emission spectra of fluorescent probe **3c** (10<sup>-5</sup> M) interacting with different interferent (10<sup>-5</sup> M) (① hydroquinone, ② *p*-benzaldehyde, ③ *o*-phenylenediamine, and ④ 1,3,5-phenyltricarboxylic acid). (B) histogram of the fluorescence intensity of the fluorescent probe **3c** in presence of different species.

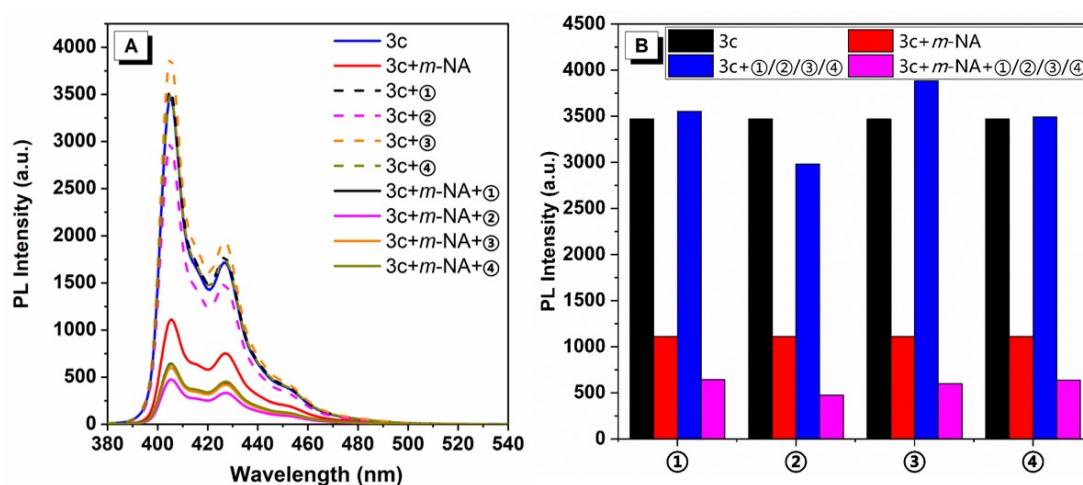

**Figure S34** The Interference experiments of fluorescent probe **3c** toward *m*-NA. (A) The emission spectra of fluorescent probe **3c** (10<sup>-5</sup> M) interacting with different interferent (10<sup>-5</sup> M) (① hydroquinone, ② *p*-benzaldehyde, ③ *o*-phenylenediamine, and ④ 1,3,5-phenyltricarboxylic acid). (B) histogram of the fluorescence intensity of the fluorescent probe **3c** in presence of different species.

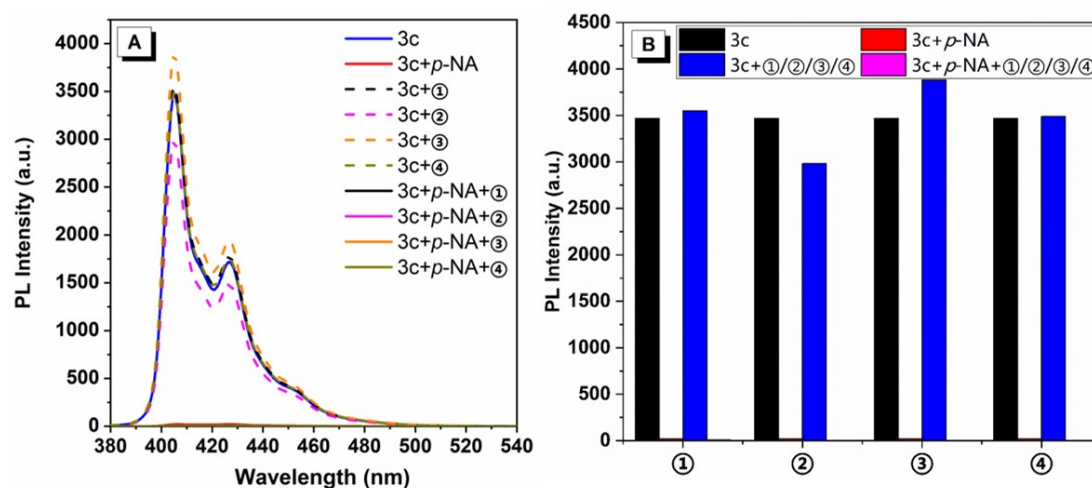

**Figure S35** The Interference experiments of fluorescent probe **3c** toward *p*-NA. (A) The emission spectra of fluorescent probe **3c** ( $10^{-5}$  M) interacting with different interferent ( $10^{-5}$  M) (① hydroquinone, ② *p*-benzaldehyde, ③ *o*-phenylenediamine, and ④ 1,3,5-phenyltricarboxylic acid). (B) histogram of the fluorescence intensity of the fluorescent probe **3c** in presence of different species.
